# Supplementary material for: Palladium crystals of various morphologies for SERS enhancement
Source: Royal Society of Chemistry journal article supplement (doi:10.1039/c1ce05557g), 2011-01-01
Supplement: c1ce05557g.pdf [file c1ce05557g.pdf]

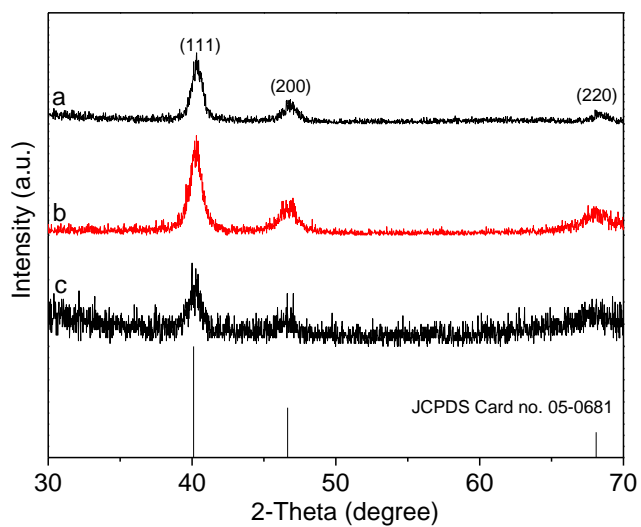

**Figure S1:** XRD patterns of (a) urchin-like, (b) flower-like and (c) pompon-like Pd particles prepared with 0.5 mM  $\text{H}_2\text{PdCl}_4$ .

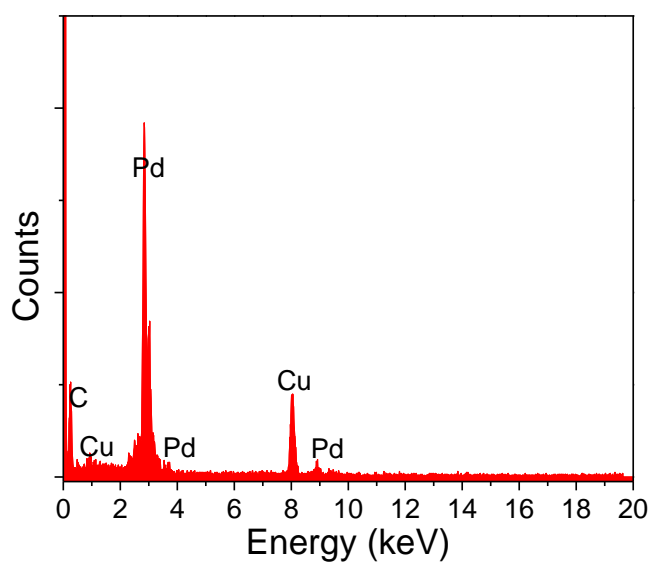

**Figure S2:** EDX spectrum of single Pd dimer prepared with 0.1 mM  $\text{H}_2\text{PdCl}_4$  in the presence of PVP (1 mM) by reaction for 3 min.

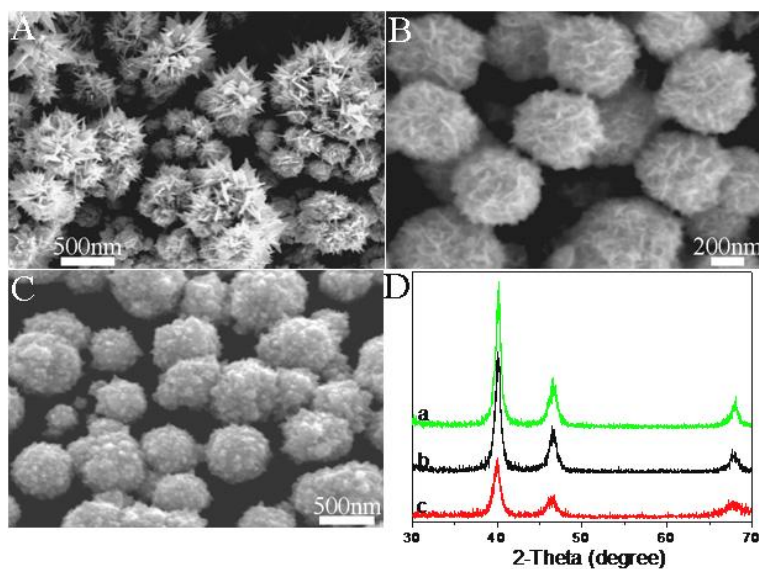

**Figure S3:** (A) SEM image of urchin-like Pt particles prepared with 0.3 mM  $\text{H}_2\text{PtCl}_6$  by 10 min reaction; (B, C) SEM images of flower-like and spherical Pt particles prepared with 0.3 mM  $\text{H}_2\text{PtCl}_6$  in the presence of CTAB (2.4 mM) and PVP (1 mM), respectively, by 20 min reaction; (D) XRD patterns of (a) urchin-like, (b) flower-like and (c) spherical Pt particles.
